# Supplementary material for: Whole-genome shotgun sequencing unravels the influence of environmental microbial co-infections on the treatment efficacy for severe pediatric infectious diseases
Source: Front Microbiol. 2024 Jan 24;15:1308871. doi: 10.3389/fmicb.2024.1308871 (PMC10847551; doi:10.3389/fmicb.2024.1308871)
Supplement: Supplementary file 1 [file Table_1.XLSX]

## Sheet: TableS1
Characteristic of Enrolled Patients(n = 127 patients)
Sex	Male	Female
	69	58
Group	4 years old and above	under 4 years old
	52	75
Age	Mean	SD
	3.964	4.11

## Sheet: TableS2
Characteristic of Enrolled Samples(n = 172 samples)
Sex	Male	Female
	95	77
DataSource	Batch1	Batch2	Batch3
	106	33	33
SampleType	BALF	Blood	CSF	Urine	Ascites
	53	74	36	4	5
MarrowDepression	Yes	No	NA
	32	137	3
InfectionSource	Pulmonary	Intracranial	Urinary tract	Bloodstream
	76	31	9	56
TreatmentResults	Cure	Improvements	Stable	Other
	43	114	1	14
Reserve antibiotics	Yes	No
	112	60
Group	4 years old and above	Under 4 years old
	77	95

## Sheet: TableS3
Trait of Samples(n = 172 samples)
Trait	unit	n	Min	1st Qu.	Median	Mean	3rd Qu.	Max	SD
Age	year	172	0	0.6675	3	4.0473	7	14	4.05777
TreatmentTime	day	172	3	13	18	26.94	38	144	21.9036
AntibioticTreatment	Cephalosporins	130	1	6	9	11.48	14	50	8.84335
	Penicillin	35	1	6	8	11.63	13	36	9.51187
	Macrolides	46	1	3	5	4.957	6	18	2.6243
	Glycopeptides (Vancomycin)	73	1	7	12	12.33	14	49	8.51804
	Tetracycline	1	14	14	14	14	14	14
	Oxazolidinones (Linezolid)	45	1	6	8	11.62	16	35	9.20546
Total hospitalization cost	RMB	169	5665	17363	36272	58423	84912	417170	59170.5
The cost of medical drugs	RMB	169	11.85	2259.34	7093.93	14163.7	22446.6	122607	16503.9
WBC		172	0.02	4.978	9.1	10.149	13.71	30.08	6.844
NE%		172	0	26.23	48.45	49.33	70.7	93.6	25.7963
LY%		172	2.2	18.57	33.7	39.68	58.02	100	25.3552
NE		172	0	1.87	4.18	7.479	7.982	305	23.4899
HGB		172	40	93	107	107.6	124	160	22.0344
PLT		172	7	168	288	298.3	411.8	898	180.663
CRP		142	0	0.6275	7.54	36.7198	51.12	242.58	58.5532
PCT		108	0	0.6275	7.54	36.7198	51.12	242.58	10.4711
ALT		158	2	13	21	68.42	41	2246	217.808
AST		158	7.9	22.9	32.65	72.02	54	1473	160.431
ALB		154	22	32	36.5	41.12	41.2	422	40.727
LDH		139	116	232	306	459.2	458.5	5804	568.316
CD3+		47	24.7	61.1	69.6	68.83	77.2	93	13.0557
CD3+CD4+		47	10.9	31.9	36.7	35.33	41.95	53.7	10.2848
CD3+CD8+		47	9.6	19.8	26.8	30.26	37.35	80.8	14.9695
CD3+CD4+/CD3+CD8+		29	0.53	1	1.57	1.581	2.21	2.68	0.674339
CD3-CD19+		48	0.9	13.25	18.85	22.82	31.55	53.2	12.1908
CD3-CD16+CD56+		48	0.6	3.85	6.1	6.952	8.625	17.7	4.74431
CD4-CD8-		8	5.1	5.375	7.8	8.562	8.825	19.4	4.68156
IgM		73	0.218	0.705	1.05	1.111	1.27	2.9	0.619586
IgG		74	2.99	8.07	11.9	12.26	14.4	38.6	6.66766

## Sheet: TableS4
The clinical information of the outlier samples
OutlierSamples	SampleType	DataSource	Sex	Age	Group	MarrowDepression	TreatmentTime	InfectionSource	TreatmentResults	AntibioticTreatment
1	BALF	1	male	0	Under 4 years old	0	41	Intracranial	Improvements	1
2	CSF	1	male	0.693333	Under 4 years old	0	17	Lung	Improvements	1
3	Blood	2	male	3.67	Under 4 years old	1	43	Bloodstream	Improvements	1
4	Blood	2	female	5.08	4 years old and above	0	20	Lung	Improvements	1
5	BALF	2	female	2.17	Under 4 years old	0	27	Lung	Improvements	1
6	BALF	2	female	0.6325	Under 4 years old	0	18	Lung	Improvements	1
7	Blood	2	male	1.83	Under 4 years old	0	11	Urinary tract	Improvements	1

## Sheet: TableS5
	TreatmentTime
Predictors	Estimates	CI	p
(Intercept)	3.49	-15.46 – 22.44	0.724
Gender [male]	1.09	-5.08 – 7.25	0.735
AgeGroup [Under 4 years	7.35	0.84 – 13.86	0.032
old]
SampleType [BALF]	10.29	-8.45 – 29.03	0.293
SampleType [Blood]	5.02	-13.42 – 23.45	0.602
SampleType [CSF]	5.65	-13.24 – 24.55	0.566
SampleType [Urine]	-1.17	-27.22 – 24.87	0.931
MarrowDepression	5.96	-2.72 – 14.64	0.19
ReserveAntibiotics	17.99	11.05 – 24.93	<0.001
Random Effects
σ2	380.89
τ00 DataSource	0
ICC	0
N DataSource	3
Observations	162
Marginal R2 / Conditional R2	0.239 / 0.239
